# Supplementary material
Source: publisher figshare collection journal article supplement (https://acs.figshare.com/ndownloader/files/3860971)
Supplement: Supplementary file 1 [file 3860971]

## **Supporting Information For:**

### **The Recession of 2008 and Its Impact on Light-Duty Vehicle Emissions in Three Western United States Cities**

Gary A. Bishop<sup>\*</sup> and Donald H. Stedman

Department of Chemistry and Biochemistry MSC 9020, University of Denver, Denver CO 80208

<sup>\*</sup>Corresponding author email: [gbishop@du.edu](mailto:gbishop@du.edu); phone: (303) 871-2584

## **Summary of Supporting Information:**

3 Pages (excluding cover): S-1 – S-3

## **Figures**

S1. Mean model year versus measurement year for all of the West Los Angeles data sets.

S2. MOVES2014 fraction of vehicle miles traveled and FEAT fleet fractions versus vehicle model year for calendar years 2013 and 2006.

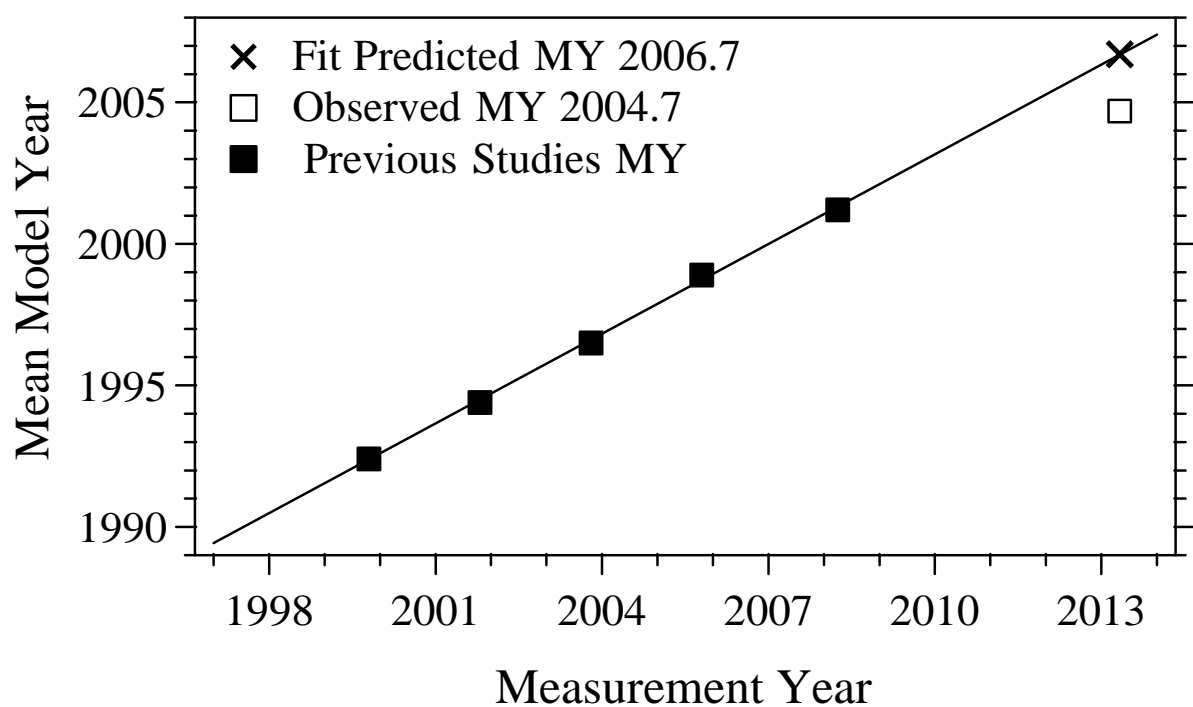

Figure S1. Mean model year versus measurement year for the six on-road emission data sets collected at the West Los Angeles site. Filled squares are for the five previous data sets and the open square marks the 2013 data sets mean model year of 2004.7. The solid line is a linear least squares fit to the five previous data sets and the X is its predicted mean model year of 2006.7. This is two model years newer than likely would have been observed if the fleet turnover rate at the West LA site had continued as in the previous fifteen years.

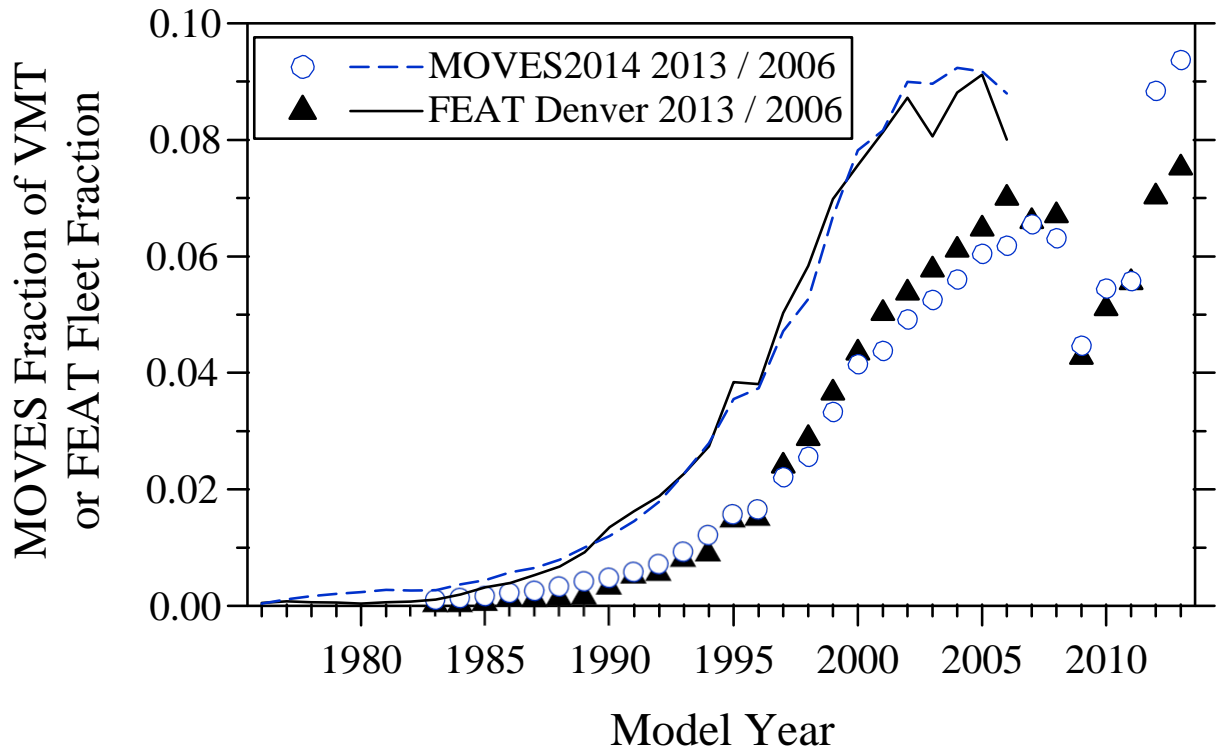

Figure S2. MOVES2014 (1) estimated fraction of vehicle miles traveled (VMT) versus vehicle model year for calendar years 2013 (open circles) and 2006 (dashed line) compared with the fleet fractions calculated from the Denver FEAT data sets collected in December 2013 (filled triangles) and February 2007 (solid line). MOVES2014 VMT data were generated using the on-road national defaults, vehicle categories of passenger cars, passenger trucks and light commercial trucks, all fuels except electric and urban restricted access road type. Fraction of VMT was calculated using the sum of all 30 model years VMT as the normalizing factor. FEAT fleet fractions were calculated using the sum total of all of the records as the normalizing factor. MOVES estimates the mean model year for calendar year 2006 of 1999.7 (~6.3 years old) and for calendar year 2013 of 2005.2 (~7.8 years old).

## References

1. MOVES (Motor Vehicle Emission Simulator), United States Environmental Protection Agency, <http://www.epa.gov/otaq/models/moves/> (accessed October 2014).
